# Supplementary material for: Association of gout with brain reserve and vulnerability to neurodegenerative disease
Source: PubMed Central journal article supplement (PMC10195870; doi:10.1038/s41467-023-38602-6), 2023-05-18
Supplement: 41467_2023_38602_MOESM3_ESM.pdf [file 41467_2023_38602_MOESM3_ESM.pdf]

## **Description of Additional Supplementary Files**

**Supplementary Data 1:** Baseline characteristics of imaging sample by serum urate quintile

**Supplementary Data 2:** Associations between serum urate and image-derived phenotypes (IDPs) amongst highest two groups of household income

**Supplementary Data 3:** Time-dependent coefficients for gout on all cause dementia incidence accounting for the competing risk of death

**Supplementary Data 4:** Instrumental variables for gout and urate.

**Supplementary Data 5:** Robust Mendelian randomization estimates
